# Supplementary material for: Ascorbic acid supports ex vivo generation of plasmacytoid dendritic cells from circulating hematopoietic stem cells
Source: eLife. 2021 Sep 2;10:e65528. doi: 10.7554/eLife.65528 (PMC8445615; doi:10.7554/eLife.65528)
Supplement: Figure 1—figure supplement 1—source data 1. [file elife-65528-fig1-figsupp1-data1.xlsx]

## Sheet: Figure 1-figure supplement 1b
	STD		LD
0	172000	186378	103400	111825
3	995100	860160	529220	707520
4	3043200	2720900	546110	482090
6	5142800	5323400	1463000	2322900
7	5686200	5613300	2195100	2225000
8	5935600	5897600	3360000	3088000
9	2070000	2106000	2033600	2090400
10	3889300	3640100	3483000	2818800
12	5990400	5715000	1262800	1435200
13	3150900	3204500	1728000	2205000
14	4892400	4955500	1064000	1152000
15	7066800	6625800	1245000	1635100
16	5817000	5869200	1447500	1540700
17	2416000	2246400	1120000	1208400
18	4657600	4083600	1482000	1785000
19	4034400	3603600	1176600	1469400
20	4605600	4729200	1555200	1358800
21	5424000	5699000	1785400	2465000

## Sheet: Figure 1-figure supplement 1c
	STD		LD
0	88	90	88	90
3	93	96	94	96
4	96	91	97	97
6	92	86	95	87
7	81	77	81	89
8	71	76	80	80
9	75	78	82	78
10	89	89	86	87
12	78	75	82	78
13	81	85	72	75
14	81	85	80	80
15	78	81	75	83
16	70	73	75	71
17	80	78	70	76
18	82	82	65	70
19	82	78	74	79
20	76	84	81	79
21	80	82	79	85
	Donor 1	Donor 2	Donor 1	Donor 2

## Sheet: Figure 1-figure supplement 1d
	SCP	LD
D1	92	76
D2	89	75

## Sheet: Figure 1-figure supplement 1g
		STD		LD
	unprimed	13641	12870	13767	14642
	primed	59451	49626	32187	41612

## Sheet: Figure 1-figure supplement 1h
	STD		LD
unprimed	3015	4332	4526	4304
primed	32284	37111	53050	33494
