# Supplementary material for: Ascorbic acid supports ex vivo generation of plasmacytoid dendritic cells from circulating hematopoietic stem cells
Source: eLife. 2021 Sep 2;10:e65528. doi: 10.7554/eLife.65528 (PMC8445615; doi:10.7554/eLife.65528)
Supplement: Figure 1—source data 1. [file elife-65528-fig1-data1.xlsx]

## Sheet: Figure 1a
		STD		LD
	0	200000	200000	200000	200000
	3	298530	258048	1023636	1265462
	4	912960	816270	1981629	2117712
	6	2571400	2661700	5308681	10203974
	7	2843100	2806650	12278975	26106242
	8	2967800	2948800	18795203	36231944
	9	4140000	4212000	38220665	75734466
	10	7778600	7280200	65461547	102000000
	12	11980800	11430000	165000000	293000000
	13	12603600	12818000	226000000	451000000
	14	19569600	19822000	263000000	527000000
	15	28267200	26503200	308000000	749000000
	16	23268000	23476800	358000000	705000000
	17	19328000	17971200	399000000	852000000
	18	37260800	32668800	528000000	1260000000
	19	40344000	36036000	492000000	1290000000
	20	46056000	47292000	651000000	1190000000
	21	54240000	56990000	747000000	2160000000

## Sheet: Figure 1b
	SCP	LD
D1	12650000	1.42298e+08
D2	8099000	2.59703e+08

## Sheet: Figure 1c
	SCP	LD
D1	23.3223	19.0483
D2	14.2113	12.0108

## Sheet: Figure 1d
	SCP unprimed		SCP primed		LD unprimed		LD primed
UT	1.94267	1.85333	2.25733	2.072	1.85867	1.624	3.73067	3.55733
R837	2.02133	1.86267	418.765	390.956	11.6347	11.3133	448.629	402.424
CpG-A	45.7853	44.1507	556.812	516.252	199.352	185.756	966.869	758.999
