# Supplementary material for: Ascorbic acid supports ex vivo generation of plasmacytoid dendritic cells from circulating hematopoietic stem cells
Source: eLife. 2021 Sep 2;10:e65528. doi: 10.7554/eLife.65528 (PMC8445615; doi:10.7554/eLife.65528)
Supplement: Figure 2—figure supplement 1—source data 1. [file elife-65528-fig2-figsupp1-data1.xlsx]

## Sheet: Figure 2-figure supplement 1b
	RPMI			SFEM II
0	533960	31500	163414	533960	31500	163414
4	533920	251920	718080	799920	614980	1306800
6	463680	701480	1002800	1478400	1310400	1054000
7	819000	711790	1943600	2671200	2268000	3096000
10	1090600	1098800	2733400	1997500	2745000	2088000
11	1797600	1963500	3411100	2763200	3731200	2963700
13	3613500	3289500	2338400	3782500	2520100	4205400
16	2390800	4411500	1768000	2189400	4289100	2312000
17	2769200	4236400	1790800	2842800	3375600	3612600
18	2461200	2461200	1963700	2990400	2864400	3283800
19	3512000	4168300	3124800	3705000	3595500	3593100
21	3803800	4544400	3593100	4250100	4659200	4333800
	Donor 1	Donor 2	Donor 3	Donor 1	Donor 2	Donor 3

## Sheet: Figure 2-figure supplement 1c
	RPMI			SFEM II
Day 16	81	83	83	89	83	81
Day 18	86	81	83	90	81	78
Day 21	87	80	85	90	88	87
	Donor 1	Donor 2	Donor 3	Donor 1	Donor 2	Donor 3

## Sheet: Figure 2-figure supplement 1f
	RPMI unprimed			RPMI primed
Day 16	2948	4339	2984	14229	18737	26973
Day 18	3649	5287	2431	16934	24376	25384
Day 21	5202	6114	3753	33976	32365	27861
	Donor 1	Donor 2	Donor 3	Donor 1	Donor 2	Donor 3

## Sheet: Figure 2-figure supplement 1g
	RPMI unprimed			RPMI primed
Day 16	2407	2710	3482	43740	25674	1883
Day 18	2823	3282	3252	39901	31713	2589
Day 21	5679	3342	3868	54532	33357	3712
	Donor 1	Donor 2	Donor 3	Donor 1	Donor 2	Donor 3
