# Supplementary material for: Ascorbic acid supports ex vivo generation of plasmacytoid dendritic cells from circulating hematopoietic stem cells
Source: eLife. 2021 Sep 2;10:e65528. doi: 10.7554/eLife.65528 (PMC8445615; doi:10.7554/eLife.65528)
Supplement: Figure 2—source data 1. [file elife-65528-fig2-data1.xlsx]

## Sheet: Figure 2a
	RPMI			SFEM II
0	114390	114390	114390	114390	114390	114390
4	800880	640381	718080	1199880	1563279	1306800
6	987638	1426530	1875236	4479552	5279694	3478200
7	1744470	1447496	3634532	8093736	9137931	10216800
10	3803468	3181018	26762990	39405480	62726840	52684420
11	6269130	5684318	34880310	54510750	85262810	74780080
13	11326700	18698060	61430660	102933200	107430200	157231500
16	27075810	82479220	134716000	225289300	460767100	363446400
17	36289380	148662600	619103700	619619300	590644100	827005400
18	64506300	146343800	661895900	740747100	672239400	1085339000
19	73637610	339139400	1119368000	1697127000	876994400	2305858000
21	97558560	441283500	1562935000	2387939000	1376540000	3442602000

## Sheet: Figure 2b
	RPMI			SFEM II
Day 16	8124879	25783790	22700000	58695100	135119000	104000000
Day 18	18576330	48034720	74517720	173391400	224544400	358822800
Day 21	25448750	215998600	335480100	459274800	454230500	828184400

## Sheet: Figure 2c
	RPMI			SFEM II
Day 16	30.04	31.28	22.44	26.06	29.32	28.69
Day 18	28.7977	32.9268	20.5912	23.4076	33.5079	33.0609
Day 21	27.4904	35.3117	20.0696	21.3936	35.9219	26.0895

## Sheet: Figure 2d
	RPMI unprimed			RPMI primed			SFEM II unprimed			SFEM II primed
Day 16	4.18267	5.23733	5.48667	105.257	655.767	311.093	15.7893	9.61067	4.50533	1141.17	450.405	431.439
Day 18	4.67867	2.94	4.996	80.8227	717.248	313.512	3.604	4.84533	4.63067	1334.51	298.851	368.763
Day 21	7.696	12.6707	7.18533	293.049	253.976	151.748	8.07333	3.724	4.976	540.004	634.472	292.612

## Sheet: Figure 2e
	RPMI unprimed			RPMI primed			SFEM II unprimed			SFEM II primed
Day 16	22.8507	600.731	91.056	99.5	788.885	247.951	1202.86	1095.62	340.415	2744.4	1994.55	1063.72
Day 18	56.5	251.624	141.343	230.629	989.317	224.448	1532.94	444.397	636.919	3412.68	1209.86	1244.34
Day 21	106.327	674.528	333.972	177.673	408.341	959.661	101.247	245.323	283.791	1579.85	913.369	462.105
