# Supplementary material for: Ascorbic acid supports ex vivo generation of plasmacytoid dendritic cells from circulating hematopoietic stem cells
Source: eLife. 2021 Sep 2;10:e65528. doi: 10.7554/eLife.65528 (PMC8445615; doi:10.7554/eLife.65528)
Supplement: Figure 3—figure supplement 1—source data 1. [file elife-65528-fig3-figsupp1-data1.xlsx]

## Sheet: Figure 3-figure supplement 1a
	0	1	2	3	4	5	6	7	8
Donor 1	100000	81589	163930	142000	408510	179540	288470	118750	223250
Donor 2	100000	131580	121360	115280	197120	154000	377280	141120	169750
Donor 3	100000	142290	103550	103200	295450	142710	283360	116400	159570
Donor 4	100000	124960	163930	147600	384120	191360	306360	142290	157620

## Sheet: Figure 3-figure supplement 1b
	0	1	2	3	4	5	6	7	8
Donor 1	1	0.81589	2.45895	3.55	10.2127	24.448	39.281	62.1949	116.926
Donor 2	1	1.3158	1.8204	2.882	4.928	10.1188	24.7898	46.6445	56.1076
Donor 3	1	1.4229	1.55325	2.58	7.38625	14.0068	27.9062	43.3105	59.3733
Donor 4	1	1.2496	2.45895	3.69	9.603	24.5017	39.2263	74.4202	82.4381

## Sheet: Figure 3-figure supplement 1c
	0	1	2	3	4	5	6	7	8
Donor 1	100000	131580	182040	288200	492800	1011883	2478981	4664451	5610761
Donor 2	100000	142290	155325	258000	738625	1400679	2790624	4331048	5937331
Donor 3	100000	81589	245895	355000	1021275	2444796	3928096	6219486	11692630
Donor 4	100000	124960	245895	369000	960300	2450173	3922633	7442020	8243807

## Sheet: Figure 3-figure supplement 1f
	0	4	6	8
Donor 1	88.8	86.6	82.3	85.7
Donor 2	92.2	91.4	85.8	85
Donor 3	95.5	90	89.5	85.6
Donor 4	91.3	95.9	89	87.1

## Sheet: Figure 3-figure supplement 1g
	0	4	6	8
Donor 1	93.9	99.6	99.8	99.8
Donor 2	99.3	99.7	99.3	98.8
Donor 3	99.9	99.2	99.9	99.4
Donor 4	95.1	99.8	99.5	99.3

## Sheet: Figure 3-figure supplement 1h
	0	4	6	8
Donor 1	231633	713000	524000	401000
Donor 2	159654	550000	350280	238705
Donor 3	554000	299110	348965	211649
Donor 4	236028	582000	423000	311740
