# Supplementary material for: Ascorbic acid supports ex vivo generation of plasmacytoid dendritic cells from circulating hematopoietic stem cells
Source: eLife. 2021 Sep 2;10:e65528. doi: 10.7554/eLife.65528 (PMC8445615; doi:10.7554/eLife.65528)
Supplement: Figure 3—figure supplement 2—source data 1. [file elife-65528-fig3-figsupp2-data1.xlsx]

## Sheet: Figure 3-figure supplement 2_j
	Days of pre-expansion
	0				4				6				8
0	100000	100000	100000	100000	100000	100000	100000	100000	100000	100000	100000	100000	100000	100000	100000	100000
1
2
3	745290				791100				602530				337560
4	1587600	1080000	1453600	1479800	1462000	1283800	1583400	1284800	918000	763390	1011500	895310	690920	840750	685800	648440
5
6	2448500		1880000		1439900		1118600		1368500		1152800		1139000		1329900
7	4042000	3680800	2312000	3224000	2411200	3871500	1760000	2058000	2331600	1740000	1381600	1773000	1264900	2079000	1033200	1200600
8	4761000				2444700				2625500				2593500
9
10		4408200	5090800	4701200		2666400	3139500	4800000		3765500	1661400	2968000		2836500	1635200	4390700
11	3515600				4151400				2829000				2287800
12			1738800	2025000			2016000	1938300			1747200	1754800			2099500	1709100
13				3295600				2872100				2449200				2354500
14	3484800	2939100	3996000		1861400	2323200	2943000		1935000	1971600	3087500		1562400	1842300	2523200
15
16	1905300	4455500	3292800	2996300	1888000	3882200	3684800	1824000	1755000	3068500	3114000	2251700	1402700	4071600	3395000	1441800
17
18	2500900	2101800	2338700	1520000	2440200	1940000	2303000	1600800	2046800	2677200	2127040	1553100	1777500	3163500	2871000	1070100
19
20
21	2755000	3654000	2923400	1990800	2269500	5272500	3369600	1913500	2736000	3484800	3398400	1260000	3298000	3430000	3394800	1611000
	Donor 1	Donor 2	Donor 3	Donor 4	Donor 1	Donor 2	Donor 3	Donor 4	Donor 1	Donor 2	Donor 3	Donor 4	Donor 1	Donor 2	Donor 3	Donor 4

## Sheet: Figure 3-figure supplement 2_k
	Days of pre-expansion
	0				4				6				8
0	94	95	87	82	81	95	98	100	98	92	85	100	92	88	97	93
1
2
3	91				90				89				87
4	98	100	92	98	86	98	91	88	85	97	85	97	92	95	90	86
5
6	83		94		77		94		85		88		85		93
7	86	86	85	80	88	89	88	84	87	87	88	90	91	90	84	87
8	90				87				89				95
9
10		93	89	73		88	91	75		85	71	80		93	73	83
11	94				74				82				93
12			84	81			90	71			91	82			95	81
13				77				77				78				85
14	88	97	90		82	88	90		86	93	95		93	89	83
15
16	87	95	84	83	80	94	94	80	78	95	90	89	83	87	97	89
17
18	89	93	91	80	83	97	94	92	86	97	92	93	79	95	87	87
19
20
21	95	90	94	79	85	95	96	89	96	96	96	90	97	98	92	90
	Donor 1	Donor 2	Donor 3	Donor 4	Donor 1	Donor 2	Donor 3	Donor 4	Donor 1	Donor 2	Donor 3	Donor 4	Donor 1	Donor 2	Donor 3	Donor 4

## Sheet: Figure 3-figure supplement 2_m
	Day 16 isolation
	unprimed				primed
0	26741	7662	8129	20953	52035	15368	26648	42957
4	31281	7743	9573	9573	61087	17727	31831	10370
6	50958	9473	8929	10850	55793	19340	29175	12213
8	45898	8992	9375	11592	77973	21471	27306	10156
	Donor 1	Donor 2	Donor 3	Donor 4	Donor 1	Donor 2	Donor 3	Donor 4
	Day 21 isolation
	unprimed				primed
0	20663	8475	8214	27593	41775	11352	12958	41341
4	29073	6738	8300	15693	35961	17851	14586	27593
6	33539	7989	9181	10626	38289	14136	14485	25291
8	34608	8073	9673	11836	44948	18678	6832	20591
	Donor 1	Donor 2	Donor 3	Donor 4	Donor 1	Donor 2	Donor 3	Donor 4

## Sheet: Figure 3-figure supplement 2_n
	Day 16 isolation
	unprimed				primed
0	2114	1191	1935	1571	10937	3740	7412	7580
4	1869	1321	3101	1136	9813	7436	9875	15685
6	2154	1136	2663	1284	15937	7604	9384	27514
8	2168	1546	2784	1475	13543	5477	13202	14436
	Donor 1	Donor 2	Donor 3	Donor 4	Donor 1	Donor 2	Donor 3	Donor 4
	Day 21 isolation
	unprimed				primed
0	1929	978	1484	1245	9875	4853	10661	9596
4	2259	1673	1346	1941	17483	5408	4627	22571
6	2273	2003	1338	1657	23229	6567	7900	30185
8	2399	1760	2009	1438	20509	5800	9719	17372
	Donor 1	Donor 2	Donor 3	Donor 4	Donor 1	Donor 2	Donor 3	Donor 4
