# Supplementary material for: Ascorbic acid supports ex vivo generation of plasmacytoid dendritic cells from circulating hematopoietic stem cells
Source: eLife. 2021 Sep 2;10:e65528. doi: 10.7554/eLife.65528 (PMC8445615; doi:10.7554/eLife.65528)
Supplement: Figure 3—source data 1. [file elife-65528-fig3-data1.xlsx]

## Sheet: Figure 3b
	0				4				6				8
0	100000	100000	100000	100000	100000	100000	100000	100000	100000	100000	100000	100000	100000	100000	100000	100000
1
2
3	745290				791100				602530				337560
4	1905120	1080000	1453600	1479800	1754400	1283800	1583400	1284800	1101600	763390	1011500	895310	829104	840750	685800	648440
5
6	7933140		3760000		4895660		2237200		2955960		2305600		2278000		2659800
7	13096080	7913720	4624000	6448000	8198080	9911040	3520000	4116000	5036256	3480000	2763200	3546000	2529800	4158000	2066400	2401200
8	15425640				8311980				5671080				5187000
9
10		34868860	34515620	30322740		26424020	17518410	19756800		13103940	4635306	10521560		11794170	3433920	10976750
11	54210550				34538820				16040430				11942320
12			59953820	61493680			35320320	38281420			8089536	18470150			8398000	18772750
13				100078300				56723980				25779050				25861830
14	188806500	254408500	137782100		134020800	150543400	51561360		34830000	63406660	14295130		18655060	52597660	10092800
15
16	351527800	615928300	454143000	298445200	249216000	317253400	189840900	103460900	60547500	105310900	35599250	57828660	26370760	117669200	27160000	37311340
17
18	1054664000	1291346000	995537800	453289900	421139500	615662800	499843100	165682800	99131810	282712300	139023300	89835660	53467200	371268400	72990010	34615470
19
20
21	2904552000	4605209000	3630512000	902409400	2330686000	2974534000	2486549000	316875600	271818300	841091300	546272400	113185600	179094600	841859200	258920000	111520600
	Donor 1	Donor 2	Donor 3	Donor 4	Donor 1	Donor 2	Donor 3	Donor 4	Donor 1	Donor 2	Donor 3	Donor 4	Donor 1	Donor 2	Donor 3	Donor 4

## Sheet: Figure 3c
	0				4				6				8
16	46.8797	28.8098	41.6387	26.7195	28.9002	34.9106	22.109	26.8651	28.1805	26.9031	16.9824	20.2277	30.9755	17.7697	21.9931	19.2375
21	27.0716	31.7354	33.6662	30.4008	26.51	20.8346	12.7671	20.743	13.8572	15.1789	10.0549	25.8929	8.9899	20.2305	9.61312	15.6083
	Donor 1	Donor 2	Donor 3	Donor 4	Donor 1	Donor 2	Donor 3	Donor 4	Donor 1	Donor 2	Donor 3	Donor 4	Donor 1	Donor 2	Donor 3	Donor 4

## Sheet: Figure 3d
	0				4				6				8
16	164795200	177447500	189099300	79742980	735562400	545801200	310015700	266914400	670234200	702343400	188710400	458846100	955109200	1173184000	354656600	591721400
21	786309900	1461482000	1222256000	274339300	6310096000	3054041000	2344843000	631200100	1479574000	3164878000	1532817000	1149606000	1882562000	9555796000	1477819000	1434958000
	Donor 1	Donor 2	Donor 3	Donor 4	Donor 1	Donor 2	Donor 3	Donor 4	Donor 1	Donor 2	Donor 3	Donor 4	Donor 1	Donor 2	Donor 3	Donor 4

## Sheet: Figure 3e
	Day 16 isolation
	unprimed				primed
0	2.516	2.22267	385.936	201.16	216.089	158.127	1822.1	3869
4	1.17067	1.776	214.651	44.4507	276.584	185.879	1539.25	2222.78
6	1.34533	2.424	9.296	14.568	147.921	166.384	1377.18	2057.09
8	2.42133	2.4048	1.89402	7.67867	55.46	12.8496	500.396	948.937
	Donor 1	Donor 2	Donor 3	Donor 4	Donor 1	Donor 2	Donor 3	Donor 4
	Day 21 isolation
	unprimed				primed
0	2.89733	3.12133	4.86	4.952	341.641	357.627	400.503	1219.91
4	2.41067	2.88933	4.76667	0.496	112.341	50.5973	129.229	857.399
6	2.42267	3.5168	4.644	3.29467	5.39467	26.5824	8.99467	631.708
8	2.564	3.79253	4.97067	0	8.94933	14.7004	6.93867	516.085
	Donor 1	Donor 2	Donor 3	Donor 4	Donor 1	Donor 2	Donor 3	Donor 4

## Sheet: Figure 3f
		Day 16 isolation
		unprimed				primed
	0	113.911	21.8027	3603.63	3785.44	582.24	3524.28	2959.7	5544.42
	4	22.1427	6.812	2435.11	1587.02	732.807	1301.79	2735.47	3709.98
	6	4.51733	12.8528	2292.8	97.8213	200.385	500.986	2522.06	1559.3
	8	18.096	2.3792	825.177	33.048	25.1653	120.478	1804.82	696.197
		Donor 1	Donor 2	Donor 3	Donor 4	Donor 1	Donor 2	Donor 3	Donor 4
		Day 21 isolation
		unprimed				primed
	0	3.18933	3.38	5.452	45.696	313.939	709.135	236.113	639.271
	4	2.528	2.912	4.72667	25.76	239.763	397.279	302.651	868.007
	6	2.53733	4.4368	4.82	8.652	4.94933	139.506	185.2	898.819
	8	2.496	3.9208	5.10933	107.103	3.396	32.2799	8.404	203.507
		Donor 1	Donor 2	Donor 3	Donor 4	Donor 1	Donor 2	Donor 3	Donor 4
