# Supplementary material for: Ascorbic acid supports ex vivo generation of plasmacytoid dendritic cells from circulating hematopoietic stem cells
Source: eLife. 2021 Sep 2;10:e65528. doi: 10.7554/eLife.65528 (PMC8445615; doi:10.7554/eLife.65528)
Supplement: Figure 4—figure supplement 1—source data 1. [file elife-65528-fig4-figsupp1-data1.xlsx]

## Sheet: Figure 4-figure supplement 1a
	SFEM II	GMP (DC)	GMP (SCGM)
0	100000	100000	100000
3	906950	672000	767250
5	4978000	4275000	3665200
6	12040800	9112000	7740000
8	28195200	18665930	18851200
11	148000000	55820770	64098700
14	379000000	94483200	151000000
17	788000000	113000000	184000000
19	1020000000	184000000	236000000
21	850000000	247000000	303000000
	Donor 1	Donor 1	Donor 1

## Sheet: Figure 4-figure supplement 1b
	SFEM II	GMP (DC)	GMP (SCGM)
0	95	95	95
3	97	96	99
5	95	95	98
6	87	85	90
8	89	85	86
11	89	79	79
14	84	76	80
17	91	74	88
19	85	78	96
21	90	81	89
	Donor 1	Donor 1	Donor 1

## Sheet: Figure 4-figure supplement 1c
	SFEM II	GMP (DC)	GMP (SCGM)
Donor 1	107000000	40694400	63758240

## Sheet: Figure 4-figure supplement 1d
	SFEM II	GMP (DC)	GMP (SCGM)
Donor 1	12.635	16.4721	21.0734

## Sheet: Figure 4-figure supplement 1e
	SFEM II	GMP (DC)	GMP (SCGM)
Donor 1	89	81	91

## Sheet: Figure 4-figure supplement 1g
	SFEM II primed		GMP (DC) primed		GMP (SCGM) primed
UT	66.584	9.792	6.92	6.452	6.612	7.036
R837	1769.85	2008	230.612	218.652	240.108	337.54
CpG-A	2272	2016	117.912	161.64	190.216	78.956
