# Supplementary material for: Ascorbic acid supports ex vivo generation of plasmacytoid dendritic cells from circulating hematopoietic stem cells
Source: eLife. 2021 Sep 2;10:e65528. doi: 10.7554/eLife.65528 (PMC8445615; doi:10.7554/eLife.65528)
Supplement: Figure 4—figure supplement 2—source data 1. [file elife-65528-fig4-figsupp2-data1.xlsx]

## Sheet: Figure 4-figure supplement 2h
	SFEM II				GMP (DC)				GMP (DC) + AA
0	100000	100000	100000	100000	100000	100000	100000	100000	100000	100000	100000	100000
1
2
3	745290				309690				196200
4	1587600	1080000	1453600	1479800	766080	332120	918650	1574300	492900	288640	854400	1440000
5
6	2448500		1880000		2867000		2079000		4076800		1069500
7	4042000	3680800	2312000	3224000	0	1142400	2321800	1656000		931000	2025600	2997000
8
9
10		4408200	5090800	4701200	0	4984200	5320300	3031700		5745600	4012800	3936000
11
12			1738800	2025000			1044900	1327700			2018800	1881600
13
14	3484800	2939100	3996000		2190000	1932700	1903900		3813600	1919000	2650800
15
16	1905300	4455500	3292800	2996300	951300	4108500	2190000	1869900	1647000	3928400	3162000	2551700
17
18	2500900	2101800	2338700	1520000	2438000	1829100	2074000	1372800	2611700	2457600	2946900	1931300
19
20
21	2755000	3654000	2923400	1990800	1165800	4655200	2810700	1398400	2437600	3976200	2726000	1505000
	Donor 1	Donor 2	Donor 3	Donor 4	Donor 1	Donor 2	Donor 3	Donor 4	Donor 1	Donor 2	Donor 3	Donor 4

## Sheet: Figure 4-figure supplement 2j
	SFEM II				GMP (DC)				GMP (DC) + AA
0	94	95	87	82	94	95	87	100	94	95	87	100
1
2
3	91				93				90
4	98	100	92	98	96	92	95	91	93	88	96	96
5
6	83		94		94		90		91		93
7	86	86	85	80		84	94	69		98	96	90
8	90				96				97
9
10		93	89	73		78	83	71		84	88	82
11	94				80				77
12			84	81			81	71			98	84
13				77				74				77
14	88	97	90		73	77	79		84	95	94
15
16	87	95	84	83	63	83	73	69	90	92	93	79
17
18	89	93	91	80	92	91	85	78	91	96	94	89
19
20
21	95	90	94	79	67	88	81	76	88	94	94	86
	Donor 1	Donor 2	Donor 3	Donor 4	Donor 1	Donor 2	Donor 3	Donor 4	Donor 1	Donor 2	Donor 3	Donor 4

## Sheet: Figure 4-figure supplement 2k
	SFEM II				GMP (DC)				GMP (DC) + AA
Day 16 isolation	85	86	88	72	86	80	69	74	91	93	89	74
Day 21 isolation	85	83	79	74	80	75	71	65	96	95	95	82
	Donor 1	Donor 2	Donor 3	Donor 4	Donor 1	Donor 2	Donor 3	Donor 4	Donor 1	Donor 2	Donor 3	Donor 4

## Sheet: Figure 4-figure supplement 2l
	Unstimulated
	IL-3			IFN
GMP (DC)	0	0	0	0	0	0
GMP (DC) + AA	0	0	0	1.7545	8.5735	38.597
	Donor 1	Donor 2	Donor 3	Donor 1	Donor 2	Donor 3
	R837
	IL-3			IFN
GMP (DC)	0	0	0	0	0	17.683
GMP (DC) + AA	0	0	0	45.7915	103.776	78.347
	Donor 1	Donor 2	Donor 3	Donor 1	Donor 2	Donor 3
	CpG-A
	IL-3			IFN
GMP (DC)	0	0	0	0	0	5.506
GMP (DC) + AA	3.782	0	11.74	48.7835	38.6065	92.2335
	Donor 1	Donor 2	Donor 3	Donor 1	Donor 2	Donor 3

## Sheet: Figure 4-figure supplement 2m
		Unstimulated
		IL-3			IFN
	GMP (DC)	0	0	0	0	0	0
	GMP (DC) + AA	0	0	0	2.5145	3.841	22.9745
		Donor 1	Donor 2	Donor 3	Donor 1	Donor 2	Donor 3
		R837
		IL-3			IFN
	GMP (DC)	0	0	0	0	0	5.9485
	GMP (DC) + AA	0	0	0	197.83	80.016	60.6805
		Donor 1	Donor 2	Donor 3	Donor 1	Donor 2	Donor 3
		CpG-A
		IL-3			IFN
	GMP (DC)	0	0	0	0	0	0
	GMP (DC) + AA	0	0	0	22.224	11.615	26.442
		Donor 1	Donor 2	Donor 3	Donor 1	Donor 2	Donor 3

## Sheet: Figure 4-figure supplement 2o
	IL-3				IFN
SFEM II	26741	7662	8129	9573	52035	15368	26648	10370
GMP (DC)	35835	13464	5546	15050	52766	25028	16192	22232
GMP (DC) + AA	11079	6785	2982	6177	36086	35961	7851	18165
	Donor 1	Donor 2	Donor 3	Donor 4	Donor 1	Donor 2	Donor 3	Donor 4
	IL-3				IFN
SFEM II	1929	978	1484	15693	9875	4853	10661	27593
GMP (DC)	40626	10263	10626	18874	59200	17421	14334	33075
GMP (DC) + AA	11836	6553	3920	4980	34972	32960	8505	19206
	Donor 1	Donor 2	Donor 3	Donor 4	Donor 1	Donor 2	Donor 3	Donor 4

## Sheet: Figure 4-figure supplement 2p
	IL-3				IFN
SFEM II	2114	1191	1935	1136	10937	3740	7412	15685
GMP (DC)	685	652	913	1461	5950	1793	5140	9907
GMP (DC) + AA	890	826	1112	1376	4916	2740	3510	12706
	Donor 1	Donor 2	Donor 3	Donor 4	Donor 1	Donor 2	Donor 3	Donor 4
	IL-3				IFN
SFEM II	1929	978	1484	1941	9875	4853	10661	22571
GMP (DC)	831	619	501	1760	3788	1611	2107	9688
GMP (DC) + AA	1084	677	1199	1869	11219	2182	1466	6911
	Donor 1	Donor 2	Donor 3	Donor 4	Donor 1	Donor 2	Donor 3	Donor 4

## Sheet: Figure 4-figure supplement 2s
	unprimed			primed
GMP (DC)	3998	2923	6634	7632	9650	9851
GMP (DC) + AA	3144	3455	8837	6949	10664	15157
	Donor 1	Donor 2	Donor 3	Donor 1	Donor 2	Donor 3

## Sheet: Figure 4-figure supplement 2t
		Unstimulated
		IL-3			IFN
	GMP (DC)	0	0	0	0	0	0
	GMP (DC) + AA	0	0	0	0	0	0
		Donor 1	Donor 2	Donor 3	Donor 1	Donor 2	Donor 3
		R837
		IL-3			IFN
	GMP (DC)	0	0	0	0	0	0
	GMP (DC) + AA	0	0	0	0	0	0
		Donor 1	Donor 2	Donor 3	Donor 1	Donor 2	Donor 3
		CpG-A
		IL-3			IFN
	GMP (DC)	0	0	0	0	0	0
	GMP (DC) + AA	0	0	0	0	0	0
		Donor 1	Donor 2	Donor 3	Donor 1	Donor 2	Donor 3
