# Supplementary material for: Ascorbic acid supports ex vivo generation of plasmacytoid dendritic cells from circulating hematopoietic stem cells
Source: eLife. 2021 Sep 2;10:e65528. doi: 10.7554/eLife.65528 (PMC8445615; doi:10.7554/eLife.65528)
Supplement: Figure 4—source data 1. [file elife-65528-fig4-data1.xlsx]

## Sheet: Figure 4a
	SFEM II				GMP (DC)				GMP (DC) + AA
0	100000	100000	100000	100000	100000	100000	100000	100000	100000	100000	100000	100000
1
2
3	745290			0	619380				392400
4	1905120	1080000	1453600	1479800	1838592	664240	1837300	1574300	1182960	577280	1708800	1440000
5
6	7933140		3760000		9151464		8316000		8642816		4278000
7	13096080	7913720	4624000	6448000		7585536	9287200	3312000		5373732	8102400	5994000
8	15425640				23500800				19615610
9
10		34868860	34515620	30322740		45854640	49478790	10080400		61749110	32904960	23592380
11	54210550				92736000				97944000
12			59953820	61493680			51659860	13376580			66378140	44402470
13				100078300				22664720				54511960
14	188806500	254408500	137782100		203091800	215689300	94128820		373427700	290690100	87158300
15
16	351527800	615928300	454143000	298445200	256851000	484803000	210240000	42350620	615450900	620372900	202368000	139218600
17
18	1054664000	1291346000	995537800	453289900	789912000	889966900	409108900	58224570	1351273000	1529473000	856722800	268801200
19
20
21	2804552000	4805209000	3330512000	922409400	818391600	3318599000	1164298000	81421230	3297240000	6091220000	3628851000	404524900
	Donor 1	Donor 2	Donor 3	Donor 4	Donor 1	Donor 2	Donor 3	Donor 4	Donor 1	Donor 2	Donor 3	Donor 4

## Sheet: Figure 4b
	Day 16 isolation
	SFEM II	GMP (DC)	GMP (DC) + AA
Donor 1	144795200	86676050	166108500
Donor 2	185000000	124800800	131479300
Donor 3	195000000	61600000	60400000
Donor 4	82300000	7690000	25800000
	Day 21 isolation
	SFEM II	GMP (DC)	GMP (DC) + AA
Donor 1	694000000	191020500	770000300
Donor 2	1643400000	1228077000	1901719000
Donor 3	1430000000	374502800	1361263000
Donor 4	224500000	22221230	129229900

## Sheet: Figure 4c
	SFEM II				GMP (DC)				GMP (DC) + AA
Day 16 isolation	43.1405	26.0613	28.7829	24.9865	33.7456	25.7426	29.308	18.1521	26.9897	21.1936	29.8648	18.5
Day 21 isolation	23.8923	29.8929	36.7712	21.8647	23.341	37.0059	32.1656	27.2917	23.3529	31.2207	37.5122	31.9461
	Donor 1	Donor 2	Donor 3	Donor 4	Donor 1	Donor 2	Donor 3	Donor 4	Donor 1	Donor 2	Donor 3	Donor 4

## Sheet: Figure 4d
	unprimed				primed
SFEM II	2.516	2.22267	385.936	44.4507	207.776	252.056	1497.28	2222.78
GMP (DC)	1.51467	2.6676	0.002652	5.78	23.2267	26.3831	112.495	10.2653
GMP (DC) + AA	27.2944	51.228	15.07	1008.5	1471.95	943.672	1571.46	4280.48
	Donor 1	Donor 2	Donor 3	Donor 4	Donor 1	Donor 2	Donor 3	Donor 4
	unprimed				primed
SFEM II	2.89733	3.12133	4.86	0.496	281.865	351.923	389.73	857.399
GMP (DC)	2.488	2.996	4.92533	0	24.72	9.98133	4.82533	23.0547
GMP (DC) + AA	9.72533	8.22667	5.04267	794.968	616.615	406.363	243.7	4504.37
	Donor 1	Donor 2	Donor 3	Donor 4	Donor 1	Donor 2	Donor 3	Donor 4

## Sheet: Figure 4e
	unprimed				primed
SFEM II	113.911	21.8027	3603.63	1587.02	535.565	3466.21	2735.47	3709.98
GMP (DC)	1.6	2.78893	0.002403	14.416	9.92533	20.8537	30.372	35.724
GMP (DC) + AA	3549.07	71.432	1669.1	6242.48	3151.39	8370.01	2520.09	6164.15
	Donor 1	Donor 2	Donor 3	Donor 4	Donor 1	Donor 2	Donor 3	Donor 4
	unprimed				primed
SFEM II	3.18933	3.38	5.452	25.76	343.4	644.188	319.799	868.007
GMP (DC)	2.68	3.14667	4.63733	1.56933	34.7907	10.6147	5.61467	22.208
GMP (DC) + AA	984.32	16.584	54.4333	5717.92	2840.55	488.4	1403.8	7006.35
	Donor 1	Donor 2	Donor 3	Donor 4	Donor 1	Donor 2	Donor 3	Donor 4
