# Supplementary material for: Ascorbic acid supports ex vivo generation of plasmacytoid dendritic cells from circulating hematopoietic stem cells
Source: eLife. 2021 Sep 2;10:e65528. doi: 10.7554/eLife.65528 (PMC8445615; doi:10.7554/eLife.65528)
Supplement: Figure 6—figure supplement 1—source data 1. [file elife-65528-fig6-figsupp1-data1.xlsx]

## Sheet: Figure 6-figure supplement 1a
	cHSPC per mL of buffy coat (450 mL)
Donor 1	2666.67
Donor 2	1685.82
Donor 3	1186.67
Donor 4	1186.67
Donor 5	1666.67
Donor 6	3111.11
Donor 7	5400
Donor 8	2755.56

## Sheet: Figure 6-figure supplement 1b
	Days of pre-expansion
	0	1	2	3	4
Donor 1	240000		620000		265500
Donor 2	151724		399500		110000
Donor 3	60		54600		195940
Donor 4	100978		25555.6		27871.5

## Sheet: Figure 6-figure supplement 1c
	Days of pre-expansion
	0	1	2	3	4
Donor 1	1		2.89333		3.9825
Donor 2	1		2.94904		2.61
Donor 3	1		2.81073		5.36528
Donor 4	1		2.27807		6.57042

## Sheet: Figure 6-figure supplement 1d
	Days of pre-expansion
	0	1	2	3	4
Donor 1	600000		1736000		2389500
Donor 2	379310		1118600		990000
Donor 3	91300		256620		489850
Donor 4	454410		517500		2985665

## Sheet: Figure 6-figure supplement 1f
	Days of pre-expansion
	0	4
Donor 1	98	94.5
Donor 2	96.4	88.5
Donor 3	99.1	98.6
Donor 4	99.6	98.5

## Sheet: Figure 6-figure supplement 1g
	Days of pre-expansion
	0	4
Donor 1	95.9	96.3
Donor 2	76.4	89.8
Donor 3	98.8	100
Donor 4	97.1	100

## Sheet: Figure 6-figure supplement 1h
	Days of pre-expansion
	0	4
Donor 1	109033	452000
Donor 2	12603	410000
Donor 3	196346	562000
Donor 4	176875	568000

## Sheet: Figure 6-figure supplement 1j
	Days of pre-expansion
	0				4
0	500000	500000	200000	500000	500000	500000	200000	500000
1
2
3	283200	589620	38464	2098800	350610	1691000	419900	4093400
4
5	1000500			1465100	1441800			4376400
6
7		4125100	614460	1999200		2705100	2463700	1349400
8
9	1561600				2626000
10		2223000	656250	2097600		1854400	1960000	1590000
11
12	4632000				2855200
13		2156000	2709700	2776100		904800	1050700	1419600
14
15
16	2392500	1476800	1942500	2167500	2612400	1926000	2149700	1215000
	Donor 1	Donor 2	Donor 3	Donor 4	Donor 1	Donor 2	Donor 3	Donor 4

## Sheet: Figure 6-figure supplement 1m
	unprimed				primed
0	9903	9036	5617	10441	23753	17228	11524	20408
4	8816	7711	4712	9004	11980	16225	8571	17535
	Donor 1	Donor 2	Donor 3	Donor 4	Donor 1	Donor 2	Donor 3	Donor 4

## Sheet: Figure 6-figure supplement 1n
	unprimed				primed
0	1116	1598	738	1408	2072	4611	2566	5685
4	1142	1862	855	1548	4226	4389	2642	4902
	Donor 1	Donor 2	Donor 3	Donor 4	Donor 1	Donor 2	Donor 3	Donor 4

[truncated: 1 more sheets: Figure 6-figure supplement 1o]
