# Supplementary material for: Ascorbic acid supports ex vivo generation of plasmacytoid dendritic cells from circulating hematopoietic stem cells
Source: eLife. 2021 Sep 2;10:e65528. doi: 10.7554/eLife.65528 (PMC8445615; doi:10.7554/eLife.65528)
Supplement: Figure 6—source data 1. [file elife-65528-fig6-data1.xlsx]

## Sheet: Figure 6a
	Days of pre-expansion
	0				4
0	100000	100000	100000	100000	100000	100000	100000	100000
1
2
3	283200	336292	53090.4	524766	350610	824905	611796	856942
4
5	1000500			1.5532e+06	1441800			1.8736e+06
6
7		4.70553e+06	848116	3.74897e+06		4.39868e+06	3.58962e+06	2.82493e+06
8
9	3123200				5252000
10		1.26789e+07	2.26449e+06	7.86698e+06		9.04615e+06	1.42786e+07	4.99293e+06
11
12	14451840				1.49955e+07
13		2.72989e+07	9.35024e+06	2.17951e+07		8.2391e+06	1.50026e+07	7.13255e+06
14
15
16	35887500	2.86381e+07	1.09928e+07	2.70971e+07	39186000	1.25272e+07	1.99203e+07	5.08714e+06
	Donor 1	Donor 2	Donor 3	Donor 4	Donor 1	Donor 2	Donor 3	Donor 4

## Sheet: Figure 6b
	Days of pre-expansion
	0	4
Donor 1	1388025	4.55558e+06
Donor 2	8.48685e+06	1.54243e+07
Donor 3	2.07267e+06	4.53938e+06
Donor 4	2.10439e+06	7.57901e+06

## Sheet: Figure 6c
	Days of pre-expansion
	0	4
Donor 1	38.68	29.19
Donor 2	29.63	22.94
Donor 3	18.85	20.6
Donor 4	11.42	22.67

## Sheet: Figure 6d
	unprimed				primed
0	1.11333	0	0	12.2933	146.852	272.248	573.616	2377.76
4	0.845333	0	0	0	51.6629	604.856	388.017	2510.86
	Donor 1	Donor 2	Donor 3	Donor 4	Donor 1	Donor 2	Donor 3	Donor 4

## Sheet: Figure 6e
	unprimed				primed
0	0.961333	34.1453	468.268	1291.02	458.44	875.668	3089.28	4212.33
4	1.072	0	0	740.421	359.43	775.331	3264.81	5178.67
